# Supplementary material for: Optimal Initial Blood Pressure in Intensive Care Unit Patients with Non-Traumatic Intracranial Hemorrhage
Source: MDPI journal article supplement (doi:10.3390/ijerph17103436), 2020-05-14
Supplement: s1 [file s1]

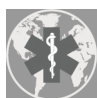

Supplementary Material:

(a) Smoothing components for MBP

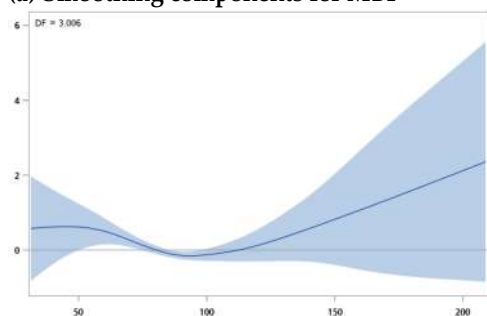

(b) Smoothing components for SBP

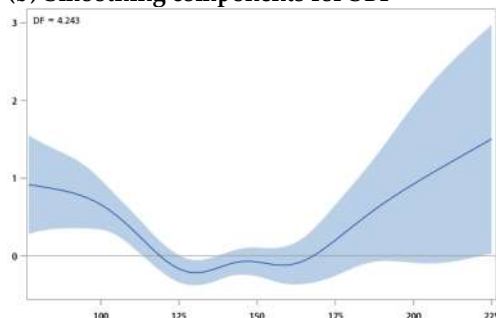

(c) Smoothing components for DBP

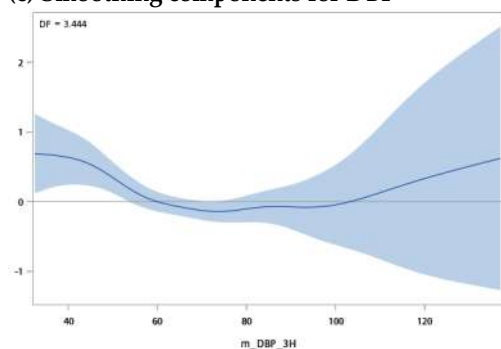

**Figure S1.** The spline transformations for MAP, SBP, and DBP to assess the odds for 14-day mortality. Smoothing components for (a) MBP, (b) SBP, and (c) DBP. MAP, mean arterial pressure; SBP, systolic blood pressure; DBP, diastolic blood pressure.
